# Supplementary material for: ABC transporters are involved in defense against permethrin insecticide in the malaria vector Anopheles stephensi
Source: PubMed Central journal article supplement (PMC4124152; doi:10.1186/1756-3305-7-349), 2014-07-29
Supplement: 13071_2014_1536_MOESM2_ESM.pdf [file 13071_2014_1536_MOESM2_ESM.pdf]

**AnstABC2 gene**

AnstABC2 -----NDFSRSSTHVCT-----CFANFPNLISD 100  
AGAP005639 MTAKEYPQGNQTFQTMNLKNGNGADNMSVASHKSTKDILDVKAPTKEPVSQSVSYFKLFRFATWGEVCATLMGVLLASMASLGLPYGVILYGEFTTLLVD  
:::\* ::\* .\* :.\*..\*:\*

AnstABC2 YRR-----VNATEQENAAAIMEDAKAFGLGVAVTILQFIFATLSVDIINRSAQKQISRIRQLFLKAVLRQDMTWYDLNSDDSF 200  
AGAP005639 RTIGIGKSTDTAILSIFGGGRVLVNATEQENAAAIMEDAKAFGLGVAVTILQFIFATLSVDVINRSAQKQISRIRQLFLKAVLRQDMTWYDLNSDDSF  
\*\*\*\*\*.\*\*\*\*\*

AnstABC2 VRITDDLDKLKEGIGEKLSIFTYLVMSFVISVIFSFFYGWKLTLVILSCAPIIIILATAFVAKMQSTLTEKELKSYSSAGAVAEVLSIRTVVAFGGEKK 300  
AGAP005639 VRITDDLDKLKEGIGEKLSIFTYLVMSFVISVIFSFFYGWKLTLVILSCAPIIIILATAFVAKMQSTLTEKELKSYSSAGAVAEVLSIRTVVAFGGEKK  
\*\*\*\*\*

AnstABC2 ELDRYRERLAGAELNGRRKGLFSGIGGGIMWFIIYCCYALAFWYGISLILEDRDKDLKDYTPAVLIIVLFGVLAGAQNGLSSPHLEAFSTAKGSAATIF 400  
AGAP005639 EADRYRERLAGAELNGRRKGLFSGIGGGIMWFIIYCCYALAFWYGISLILEDRDKDLKDYTPAVLIIVLFGVLAGAQNGLSSPHLEAFSTAKGSAATIF  
\* \*\*\*\*\*

AnstABC2 SVIDRKPEIDSLGDAGLRPKSMQGNIKFTNVCFRYPARNDVQVLQGLNLEIKTGQTVLVGSPGCGKSTCLQLIQRLYDPLSGTVTIDGTKVSELNIGWL 500  
AGAP005639 SVIDRIPVIDSLGDAGLRPGSMQGNIKFSNVFFRYPARNDVQVLQGLNLEIKTGQTVLVGSPGCGKSTCLQLIQRLYDPLSGSVTIDGTKVSELNIGWL  
\*\*\*\*\* \* \*\*\*\*\*.\*\*\* \*\*\*\*\*.\*\*\*\*\*

AnstABC2 RSFIGLVGQEPVLFATTIAENIRYGNPDATQSEIECAA KIANCHSFIMKLPNAYGTMIGERGAQLSGGQKQRIAIARALVRNPKILLDEATSALDPNSE 600  
AGAP005639 RSFIGLVGQEPVLFATTIAENIRYGNPDASQSEIERAAKIANCHSFITKLPNGYATMIGERGAQLSGGQKQRIAIARALVRNPKILLDEATSALDPNSE  
\*\*\*\*\*.\*\*\*\*\* \*\*\*\*\* \*\*\*.\*.\*\*\*\*\*

AnstABC2 KRVQDALERASKGRITLVSHRLSTITNADKIVYIDKGVMEQGTHEELMAARGLYYELVVASGSQKSADDESVP LAPSASFMRQESVEDGADGSDDDES 700  
AGAP005639 KRVQDALERASKGRITLVSHRLSTITNADKIVYIDKGLVMEQGTHEELMAARGLYYDLVVASGSQKTVDDDESVP MAPSALS MRQESVDDGAEASDDDES  
\*\*\*\*\*.\*\*\*\*\*.\*\*\*\*\*.\*\*\*\*\*.\*\*\*\*\*.\*\*\*\*\*.\*\*\*\*\*.\*\*\*\*\*

AnstABC2 DSGKSDEKNEEQEEVYHVS LRLKLNSPEWHYILFGCAA IIVGASFPFAVLF GEMYGILSVADPAFVKQESNFYSLLFLALGLITGLGTFQTYLF 800  
AGAP005639 DSGKSDEKNEEQEEVYHVS LMRLLKLNAP EWHYILFGCAA IIVGASFPFAVLF GEMYGILSVADPEYVKEESNFYSFLFLVLGLITGVGTFFQTYLF  
\*\*\*\*\*:\*\*\*\*\*:\*\*\*\*\*:\*\*\*\*\*:\*\*\*\*\*:\*\*\*\*\*:\*\*\*\*\*:\*\*\*\*\*:\*\*\*\*\*

AnstABC2 NIAGVRLTSRLRQKSFKAIVTQDMAWFDES RNAVGALCARLSGDCASVQGATGTRIGSLLQAASTICIGVGISFFYSWNLT LVSIVAIPVTLASITLESR 900  
AGAP005639 NIAGVRLTSRLRQKSFKAIVS QDMAWFDES RNAVGALCARLSGDCASVQGATGTRIGSLLQAASTICIGVGISFFYSWNLT LVSIIAIPVTLASITLESR  
\*\*\*\*\*.\*\*\*\*\*.\*\*\*\*\*

AnstABC2 YTQMSSLKEKQSLEGATKLAVEAISNIRTVASLGQEQHVLHRYSQETVKIDDACRRKTRLRGTVFALGQVMPFAGYGLALFYGGKLVSEKELEYKDVIKV 1000  
AGAP005639 YSQTSSLKEKQSLEGATKLAVEAISNIRTVASLGQEKHVLQRYGEETVKIDDACRRKTRLRGTVFALGQVMPFAGYGLALFYGGKLVSEKELEYKDVIKV  
\*.\* \*\*\*\*\* \*\*\*\*\*.\*\*\*.\*\*\*.\*\*\*\*\*

(continue)

(continue)

AnstABCB2 SEALIFGAWMLGQALAYAPNVNSAILSAGRLMKLLDRTPRMHNPSSTSYHLSQRTEGDIKFTDVEFRYPTRPSVPVLQGLNLDIGKGQTVALVGPSGCGK 1100  
AGAP005639 SEALIFGAWMLG-ALAYAPNVNSAILSAGRLMKLLDRTPRMHNPSSTSYHLSQRTEGDIKFTDVEFRYPTRPTVPVLQGLNLDIGKGQTVALVGPSGCGK  
\*\*\*\*\* :\*\*\*\*\* :\*\*\*\*\*

AnstABCB2 STCIQLLLRYYPDPSGKVDIDGTTTTTEFSLNRIRAQMGLVSQEPILFDRTIAENIAYGDNTRDIAMPEIEAAKMANIHEFIVNLPKGYDTSIGSKGAQL 1200  
AGAP005639 STCIQLLLRYYPDPSGKVDIDGTTTTTEFSLNRIRAQMGLVSQEPILFDRTIAENIAYGDNTREIAMPEIMEAAKMANIHEFIVNLPKGYDTSIGSKGAQL  
\*\*\*\*\* :\*\*\*\*\* :\*\*\*\*\*

AnstABCB2 SGGQKQRIAIARALVRNPRVLLLDEATSALDNQSEKIVQNALDHARTGRTCIIIAHRLTTIQNANLICVIQNGVVVEAGTHDELMAKNRIYAKLYMQQVA 1301  
AGAP005639 SGGQKQRIAIARALVRNPRVLLLDEATSALDNQSEKIVQNALDHARTGRTCIIIAHRLTTIQNANLICVIQNGVVVEAGTHDELMAKSRIYAKLYMQQVA  
\*\*\*\*\* .\*\*\*\*\*

AnstABC3 gene

AnstABC3 MLKLLLSPHRQCCWQGLLRSSPYSTDSKHVLRKTLQSFSGSRTGFLQPFRRNTTLR-AVRPSHTVTKTGSQGGRLIRVLLGGTAVTFTLGYQYRKLFVHC 100  
AGAP006273 MLKLLLSPHRQCCWQGLTRSSPYSTEGKHVLLRKTQVQSFGLGRNGFLQPIRNTIQRVTVRPSHTVTKTGSQGSRLIRVLLGGTVVSIITLGYQYRKSFVHC  
\*\*\*\*\*:\*\*\*\*:\*\*\*:\*\*\*\* \*\* .\*\*\*\*\*:\*\*\* \* .\*\*\*\*\*.\*\*\*\*\*.\*\*\*\*\*:\*.\*\*\*\*\* \*\*\*\*

AnstABC3 EASVNRLAGQRNLLDDGTVRFDWVKFWRYLRHHLGKLI GAVLAALAVAYFNIQIPNLLGVIVNKLARYAGSSIKDINTASFFRDMRGPALQIFGMYLAQS 200  
AGAP006273 EASVNRLAGQRQLVDDGAVRFDWVKFWHYLRHHLGKLI GAVMAALAVAYFNIQIPNLLGVIVNKLARYAGSSIKDINTASFFRDMRGPALQIFGMYLAQS  
\*\*\*\*\*:\*.\*\*\*\*\*:\*\*\*\*\*:\*\*\*\*:\*\*\*\*\*:\*\*\*\*\*:\*\*\*\*\*:\*\*\*\*\*:\*\*\*\*\*:\*\*\*\*\*:\*\*\*\*\*:\*\*\*\*\*:\*\*\*\*\*:\*\*\*\*\*:\*\*\*\*\*

AnstABC3 GFTFLYIILLSSQIGEQAASIRQDLFKQII IQDLEFFDHNRTGELVNRLTADVQDFKSSFKQCISQGLRSFAQLVGGGISLFWISPQLASIALVSVPLAV 300  
AGAP006273 GFTFLYIILLSSQIGEQAASIRQDLFKQII IQDLEFFDHNRTGELVNRLTADVQDFKSSFKQCISQGLRSFAQLVGGGISLFWISPQLASIALVSPVAV  
\*\*\*\*\*:\*\*\*\*\*:\*\*\*\*\*:\*\*\*\*\*:\*\*\*\*\*:\*\*\*\*\*:\*\*\*\*\*:\*\*\*\*\*:\*\*\*\*\*:\*\*\*\*\*:\*\*\*\*\*:\*\*\*\*\*:\*\*\*\*\*:\*\*\*\*\*:\*\*\*\*\*:\*\*\*\*\*

AnstABC3 AMFSLGRSLRHLSKKAQAQSERATSVSEEALSNIRTVRASASEYSEVELFRAETEKSAVISQQLGAGIAVFQALSNLCLNGMVLTTLLGGHFMSANSI 400  
AGAP006273 AMFSLGRSLRHLSKKAQAQSERATSVSEEALSNIRTVRASASEYSEIELFRVETDKSAVLSQQLGAGIAVFQALSNLCLNGMVLTTLLGGHFMSANSI  
\*\*\*\*\*:\*\*\*\*\*:\*\*\*\*\*:\*\*\*\*\*:\*\*\*\*\*:\*\*\*\*\*:\*\*\*\*\*:\*\*\*\*\*:\*\*\*\*\*:\*\*\*\*\*:\*\*\*\*\*:\*\*\*\*\*:\*\*\*\*\*:\*\*\*\*\*:\*\*\*\*\*:\*\*\*\*\*

AnstABC3 SAGDLMAFLVAAQGVQRSLAQGSILLGSVIRGMTAGARVFEFLSLEPRVDLKHGLIIPHNKLGKIEIRFEGVQFVYPTRPNQVLKDFNLVLRPGQTVALV 500  
AGAP006273 SAGDLMAFLVAAQGVQRSLAQGSILLGSVIRGMTAGARVFEFLSLEPRVDLKHGLIIPDSNLRGEIRFEGVQFIYPTRPNQVLKDFNLVLRPGQTVALV  
\*\*\*\*\*:\*\*\*\*\*:\*\*\*\*\*:\*\*\*\*\*:\*\*\*\*\*:\*\*\*\*\*:\*\*\*\*\*:\*\*\*\*\*:\*\*\*\*\*:\*\*\*\*\*:\*\*\*\*\*:\*\*\*\*\*:\*\*\*\*\*:\*\*\*\*\*:\*\*\*\*\*:\*\*\*\*\*

AnstABC3 GASGSGKSTVAALLERFYEPTAGRITIDGYELGHLSPSWLRGELIGFIEQQPVLFGTTIYENIRYGRPNATREEVMEAAKMSQSHEFVSRLPDGYDTMVG 600  
AGAP006273 GASGSGKSTVAALLERFYEPTAGRITIDGYELGHLSPSWLRGELIGFIEQQPVLFGTTIYENIRYGRPNATREEVMEAAKMSQSHEFVSRLPDGYETMVG  
\*\*\*\*\*:\*\*\*\*\*:\*\*\*\*\*:\*\*\*\*\*:\*\*\*\*\*:\*\*\*\*\*:\*\*\*\*\*:\*\*\*\*\*:\*\*\*\*\*:\*\*\*\*\*:\*\*\*\*\*:\*\*\*\*\*:\*\*\*\*\*:\*\*\*\*\*:\*\*\*\*\*:\*\*\*\*\*

AnstABC3 ERGIQLSGGQRQRIAIARALLKQPLILILDEATSALDAASEIVQSALDAAVLDRTTLVIAHRLSTIRNADVIVLDQGGQIVEVGTHTSLIKAQGYYYEL 700  
AGAP006273 ERGIQLSGGQRQRIAIARALLKQPTILILDEATSALDAASEAVVQRALDAAVLDRTTLVIAHRLSTIRNADVIVLDQGGQIVEVGTHTSLLLKAQGYYYEL  
\*\*\*\*\*:\*\*\*\*\*:\*\*\*\*\*:\*\*\*\*\*:\*\*\*\*\*:\*\*\*\*\*:\*\*\*\*\*:\*\*\*\*\*:\*\*\*\*\*:\*\*\*\*\*:\*\*\*\*\*:\*\*\*\*\*:\*\*\*\*\*:\*\*\*\*\*:\*\*\*\*\*:\*\*\*\*\*

AnstABC3 VKQQRQQRQEQDSRALG 718  
AGAP006273 VKQQRQQRQEHARSYG  
\*\*\*\*\*:\*.\*\*\*\*\*:\*\*\*\*\*:\*\*\*\*\* \*

AnstABC4

AnstABC4 MAALLQVVSQAPQLNRNLLLEGVRLSYKNHHPLCENYCRQLHSRQLHVSQVAVANWYNDDARSRKGGREPWAQRRNYSTE----TKNQOATENALLNIS 100  
AGAP006364 MAA-LLHVVSQAPQLNRNLLLEGVRLSFKNHHPLSETHCRLQSRQLHVSQVAVANWYHD---NRKRKHSEPWGQRRSYATQ GALPEKNQOATENALLNIF  
\*\*\* \*\* :\*\*\*\*\* :\*\*\*\*\* . \* :\*\*\* :\*\*\*\*\* . \* .\*\*\*\*\* : \* .\*\* : \*\*\* .\*\*\* . \* : \* : \*\*\*\*\*

AnstABC4 QKKKKAPLLLQVVSQAPQLNRNLLLEGVRLSYKNHHPLCENYCRQLHSRQLHVSQVAVANWYNDDARSRKGGREPWAQRRNYSTE----TKNQOATENALLNIS 200  
AGAP006364 QKKRKAPWEIRTTDSSHSATRQ----RPQAQ---QERYYRRSGDSSMTNRLHPSSFSSMLRGPPLAKPTSAITSNSSIL--LPATQPSIQAPFTKQPP  
\*\*\* :\*\*\* : . . . . \* . \* \*\*\* \* \*\*\* \*\* . . . . . \*\*\*\*\* : \*\* : \* \*\*\* . \*\*\* . \* \* : \* : . \* : \* \* . \*

AnstABC4 PIRHCFHLGHPASGESIGTYDGPEITATDMIKAMATYIWPKDDAMVRKRVLISLGLGAKVLNVCVPFLFKMGVDNLNLSMDTVPQAASALTI SVLL 300  
AGAP006364 PIRHCFHLGHPASGESIGTYDGPEITATDMIKAMATYIWPKDDAMVRKRVLISLGLGAKVLNVCVPFLFKMGVDNLNLSMDTVPQAASALTI SVLL  
\*\*\*\*\* . \*\*\*\*\* : \*\*\*\*\*

AnstABC4 GYGIARAGAAGFNELRNAV FARVAQHSIRKIATNVFLHHLNLDLQFHLSKQTGALSKTIDRGSRGINFVLTAMVFNVPPTMFEALVSSILGVKCGMAYA 400  
AGAP006364 GYGIARAGAAGFNELRNAV FARVAQHSIRKIATNVFLHHLNLDLQFHLSKQTGALSKTIDRGSRGINFVLTAMVFNVPPTMFEALVSSILGMKCGMAYA  
\*\*\*\*\* . \*\*\*\*\*

AnstABC4 ALSMGCVGVYSAYTLAVTQWRKFRYIMNQAENEAGNKAVDSLINYEYTVKYFNNEQYEANRYDQVLKKEYEDASLKTSTSLALLNFGQNAIFSVLSTIMV 500  
AGAP006364 ALSMGCVGVYSAYTLAVTQWRKFRYIMNQAENEAGNKAVDSLINYEYTVKYFNNEQYEANRYDQVLKKEYEDASLKTSTSLALLNFGQNAIFSVLSTIMV  
\*\*\*\*\*

AnstABC4 MAANEIAQGRMTVGDLMVNGLLFQLSIPGLFGLSVYREVRQALLDMRTMFTLMGVQSAIQSRVNAPPLDVSRETASIEFRNVGFQRYAQSNDIFKDLSFT 600  
AGAP006364 MAANEIAQGRMTVGDLMVNGLLFQLSIPGLFGLSVYREVRQALLDMRTMFTLMGVQSAIQSRANAPPLDVRRETASIEFRNVGFQRYAQSNEIFKDLSFT  
\*\*\*\*\* . \*\*\*\*\*

AnstABC4 IPAGKKIAIVGGSGSGKSSMVRLLYRFEPPTTGEILINGQNI REVDLQSLRRAIAVVPQDSVLFHDTIRHNIHYGDLSKSQEELENAARMADLHESIQQW 700  
AGAP006364 IPAGKKIAIVGGSGSGKSSMVRLLYRFEPPTTGEILINGQNI REVDLQSLRRAIAVVPQDSVLFHDTIRHNIHYGDLSKSQTELENAARMADLHDSILQW  
\*\*\*\*\* : \*\*\*\*\* : \* : \*\*\*\*\* : \*\*\*\*\* \* \* \* \* \* : \* \* \*

AnstABC4 PKQYDTQVGERGLKLSGGEKQRVAIARAILKNSPILIFDEATSSLDSTEHNILQALARATDNRTSICIAHRLSTVMDADEILVLENGRVAQRGTHDQLL 800  
AGAP006364 PKQYETQVGERGLKLSGGEKQRVAIARAILKNSPILIFDEATSSLDSTEHNILQALARATDNRTSICIAHRLSTVMDADEILVLENGRVAQRGTHDQLL  
\*\*\*\* : \*\*\*\*\* : \*\*\*\*\* . \*\*\*\*\*

AnstABC4 RSGGLYTKLWDTQNRLYNIGGKKNLNAEKK-- 831  
AGAP006364 RSGGLYTKLWDTQNRLYNIGSKKPTKPEGEEK  
\*\*\*\*\* . \*\* . \* :

**AnstABCmember6**

|                              |                                                                                                                                                                                                                                                                                                     |     |
|------------------------------|-----------------------------------------------------------------------------------------------------------------------------------------------------------------------------------------------------------------------------------------------------------------------------------------------------|-----|
| AnstABCmember6<br>AGAP002278 | MIHYCPTNTSMNVVWFNHGVSQC FMDTVAMGTIGGFMLIFGTLQLLMYLRHATEIDTQRIRKSRLYNFQLFLLLLMPLLTVARFVLEGFIMIRYCP<br>TNTSMDVVWFNHGVSQC FMDTVAMGTIGGFMLIFGTLQLIMYLRHATEIDTQRIRKSRLYNFQLFLLVLMPLLTARFVLEAFV<br>**:*:*:*:*:*:*:*:*:*:*:*:*:*:*:*:*:*:*:*:*:*:*:*:*:*:*:*:*:*:*:*:*:*:*:*:*:*:*:*:*:*:*:*:*:*:*:*:*:*   | 90  |
| AnstABCmember6<br>AGAP002278 | FDGAQVYGF MVLSIAVALFAYPFAIVLLVKERYQ LPSVPTRGHGLVLLLFWTLV FIVQNI AFINLNYHDAWFRLET LRDKVEFGMFVAR<br>FEGAQVYGF MVLSIAVALFAYPYSIVLLVKERYQ LPSVPTRGHGLVLLVFWTL FIVQNI AFVNLNYRDAWFRLET VRDRVEFGMFVAR<br>*:*:*:*:*:*:*:*:*:*:*:*:*:*:*:*:*:*:*:*:*:*:*:*:*:*:*:*:*:*:*:*:*:*:*:*:*:*:*:*:*:*:*:*:*:*:*:*: | 180 |
| AnstABCmember6<br>AGAP002278 | YTITMLLFVIGLKAPGITSTQFTEEYQNLHQAQ-ENQSTFSNAWTKMRTLLPFLWPKKDAFLQFRVVF C FLLLIAGRLIN VYVQIYNKKI<br>YTVTMLLFVIGLKAPGITSTQFTEEYQHLLHQAQ-ENRSTFANAWTKMRTLLPFLWPKKDALLQFRVVF C FLLLIAGRLIN VYVQIYNKKI<br>**:*:*:*:*:*:*:*:*:*:*:*:*:*:*:*:*:*:*:*:*:*:*:*:*:*:*:*:*:*:*:*:*:*:*:*:*:*:*:*:*:*:*:*:*:*:    | 270 |
| AnstABCmember6<br>AGAP002278 | VDSLTEKPATFRWDWILLYVGF KFLQGGGTGSMGLLN LRSFLWIRIQQYTTREIELELFRHLHSLSLRWHLNRKTGEVLRVMDRGTDSI<br>VDSLTEKPTVFRWDWILLYVGF KFLQGGGTGSMGLLN LRSFLWIRIQQYTTREIELELFRHLHSLSLRWHLNRKTGEVLRVMDRGTDSI<br>*****:*:*:*:*:*:*:*:*:*:*:*:*:*:*:*:*:*:*:*:*:*:*:*:*:*:*:*:*:*:*:*:*:*:*:*:*:*:*:*:*:*:              | 360 |
| AnstABCmember6<br>AGAP002278 | NNLLNYILFSITPTIVDILIAVFFITAFNWWFGFIVFLTMTLYIVATIMVTEWRTKFQRRMNLADNQKARSVDSLLNFETVKYYGAEQ<br>NNLLNYILFSITPTIVDILIAVFFITAFNWWFGFIVFLTMTLYIVATIMVTEWRTKFQRRMNLADNQKARSVDSLLNFETVKYYGAEQ<br>*****:*:*:*:*:*:*:*:*:*:*:*:*:*:*:*:*:*:*:*:*:*:*:*:*:*:*:*:*:*:*:*:*:*:*:*:*:*:*:*:*:                      | 450 |
| AnstABCmember6<br>AGAP002278 | YEVSCYRDAILKFQDEEWR SIITLNLNTMQNIVCGG LLAGSMLCAYLVVYEEGLTVGDYVLFASYIIQLYVPLNWF GTFYRAIQKNFV<br>YEVSCYRDAILKFQDEEWR SIITLNLNTMQNIVCGG LLAGSMLCAYLVVYEEGLTVGDYVLFASYIIQLYVPLNWF GTFYRAIQKNFV<br>*****:*:*:*:*:*:*:*:*:*:*:*:*:*:*:*:*:*:*:*:*:*:*:*:*:*:*:*:*:*:*:*:*:*:*:*:*:*:*:*:                  | 540 |
| AnstABCmember6<br>AGAP002278 | DMENMF DLMREEQEVL DAPSAPGLAVARGRIDFNDVTFGYN AERLVL RNVSFTVP GGKTVAIVGPSGAGKSTIMRLLFRFYDV NNGSISV<br>DMENMFELMREDQEVDAPSAPGLAVARGRIDFNDVTFGYN AERLVL RNVSFTVP GGKTVAIVGPSGAGKSTIMRLLFRFYDV NNGSILV<br>*****:*:*:*:*:*:*:*:*:*:*:*:*:*:*:*:*:*:*:*:*:*:*:*:*:*:*:*:*:*:*:*:*:*:*:*:*:*:*:             | 630 |
| AnstABCmember6<br>AGAP002278 | DGQNIKIVRQASLRQAIGVVPQDTVLFNNTIKYNIQYGRVGAPEADVIMAARSADIHERIILTFPEQYETQVGERGLRLSGGEKQ RVAIAR<br>DGQNIKTVRQASLRQAIGVVPQDTVLFNNTIKYNIQYGRVGAPEADVIMAARSADIHERIILTFPEQYETQVGERGLRLSGGEKQ RVAIAR<br>*****:*:*:*:*:*:*:*:*:*:*:*:*:*:*:*:*:*:*:*:*:*:*:*:*:*:*:*:*:*:*:*:*:*:*:*:*:*:                    | 720 |
| AnstABCmember6<br>AGAP002278 | TILKSPAIVLLDEATSALDTQTERNIQ TALAKVCANRTTIIIAHRLSTIIHADEIILVLKEGSIVERGRHEMLLDQNGVYAEMWNQQLKNL<br>TILKSPAIVLLDEATSALDTQTERNIQSALAKVCANRTTIIIAHRLSTIIHADEIILVLKDGSI VERGRHDNLLEQSGVYAEMWNQQLKNL<br>*****:*:*:*:*:*:*:*:*:*:*:*:*:*:*:*:*:*:*:*:*:*:*:*:*:*:*:*:*:*:*:*:*:*:*:*:*:                      | 810 |

(continue)

(continue)

AnstABCbmember6 ELGASATEEEAALVDGNGQVANGTPNKLP AIAPPNHQHHPHH 851  
AGAP002278 ELGGSGAAEEGVDAANGQVANGTPNKVAAIAAPPAHHHHH-  
\*\*\*.\*.: \* .: .\*\*\*\*\*:.\*.\* :\*\* \*
